# Supplementary material for: Resistant and Susceptible Pinus thunbergii ParL. Show Highly Divergent Patterns of Differentially Expressed Genes during the Process of Infection by Bursaphelenchus xylophilus
Source: MDPI journal article supplement (doi:10.3390/ijms241814376), 2023-09-21
Supplement: s1 [file s1]

Table S1. Quality analysis of RNA and quantification of its purity and concentration.

| RNA Gum Map No. | Sample names | Contents (ng/μl) | Total RNA (μg) | OD260/280 | OD260/230 | RIN |
|-----------------|--------------|------------------|----------------|-----------|-----------|-----|
| 1               | ph_1d_1      | 102.9            | 3.09           | 2.14      | 1.06      | 9.4 |
| 2               | ph_1d_2      | 234.4            | 7.03           | 2.12      | 1.05      | 9.2 |
| 3               | ph_1d_3      | 171.6            | 5.15           | 2.13      | 2.06      | 9.9 |
| 4               | ph_3d_1      | 194.8            | 5.84           | 2.09      | 1.52      | 10  |
| 5               | ph_3d_2      | 177.7            | 5.33           | 2.14      | 1.09      | 9.3 |
| 6               | ph_3d_3      | 152.6            | 4.58           | 2.1       | 1.37      | 10  |
| 7               | ph_7d_1      | 203.3            | 6.1            | 2.06      | 1.31      | 8.9 |
| 8               | ph_7d_2      | 253.7            | 7.61           | 2.1       | 1.06      | 9.5 |
| 9               | ph_7d_3      | 158.4            | 4.75           | 2.09      | 1.48      | 9.7 |
| 10              | kh_1d_1      | 275.2            | 8.26           | 2.11      | 1.1       | 8.9 |
| 11              | kh_1d_2      | 194.1            | 5.82           | 2.12      | 1         | 9.1 |
| 12              | kh_1d_3      | 290.6            | 8.72           | 2.09      | 1.91      | 8.3 |
| 13              | kh_3d_1      | 291.9            | 8.76           | 2.14      | 1.12      | 9.7 |
| 14              | kh_3d_2      | 260.3            | 7.81           | 2.1       | 1.37      | 8.8 |
| 15              | kh_3d_3      | 195.1            | 5.85           | 2.13      | 1.06      | 9.4 |
| 16              | kh_7d_1      | 140.8            | 4.22           | 2.08      | 1.13      | 9.1 |
| 17              | kh_7d_2      | 132.7            | 3.98           | 2.07      | 1.02      | 7.9 |
| 18              | kh_7d_3      | 204.4            | 6.13           | 2.1       | 1.94      | 9.3 |
| 19              | kh_14_1      | 90.7             | 2.37           | 2.24      | 0.17      | 9.7 |
| 20              | kh_14_2      | 189.3            | 5.68           | 2.14      | 1.03      | 9.5 |
| 21              | kh_14_3      | 217.3            | 7.61           | 2.12      | 1.58      | 9.3 |

Table S2. Primer pairs used in this study. Elongation factor 1-alpha was used as the internal control.

| Gene ID                                                  | Primers                     |                            |
|----------------------------------------------------------|-----------------------------|----------------------------|
| Hypothetical protein                                     | F: TGGAGTGACCTCGTAGAA       | R: ATGTGACTTGAATGAAGACTT   |
| Peroxidase                                               | F: GAAGAGATGGAATGAGAT       | R: CATTGAGAACAACAAGAT      |
| Extracellular calcium sensing receptor                   | F: TTACCTATGCTTCTATCCA      | R: GTATGTATCCTCCACCTT      |
| Putative truncated TIR-NBS-LRR protein                   | F: ACGGTTATTCTGTGTTCT       | R: CGAAGACTGTGGTAGATAT     |
| Putative TIR/NBS/LRR disease resistance protein, partial | F: CTATACCTAATTGCTGCTCCAA   | R: ACATATCATCGCCGTTTAC     |
| Uncharacterized protein LOC110613552                     | F: TAGTTATGCCAATCTGATATG    | R: ATCCTCTTCACCATCTTC      |
| Glycerophosphodiester phosphodiesterase GDPDL7-like      | F: TTACAAGCACCTACAAGT       | R: GTCCACGAACTGAAGATA      |
| Elongation factor-1 alpha                                | F: AGATTGGAAATGGTTATGCCCTGT | R: CCAGAACGCCTGTCAACCTTGGT |

Table S3 The expression of DEGs in susceptible and resistant *P. thunbergii*.

| Host of PWN                         | gene name | gene id               | gene set       | FC        | log2FC   | P value |
|-------------------------------------|-----------|-----------------------|----------------|-----------|----------|---------|
| Susceptible<br><i>P. thunbergii</i> | SUM2      | TRINITY_DN61527_c0_g1 | ph_1d_vs_ph_3d | 3.71000   | 1.89000  | 0.01864 |
|                                     | PR1       | TRINITY_DN6837_c0_g1  | ph_1d_vs_ph_3d | 20.04000  | 4.36000  | 0.03495 |
|                                     | CAT1      | TRINITY_DN56912_c1_g1 | ph_1d_vs_ph_3d | 280.87000 | 8.14000  | 0.03101 |
|                                     | PLR       | TRINITY_DN57829_c0_g1 | ph_1d_vs_ph_3d | 0.05643   | -4.14715 | 0.00000 |
| PWN-resistant <i>P. thunbergii</i>  | SUM2      | TRINITY_DN61527_c0_g1 | kh_1d_vs_kh_3d | 3.34000   | 1.73859  | 0.03761 |
|                                     |           | TRINITY_DN56888_c0_g1 | kh_1d_vs_kh_3d | 2.90978   | 1.54091  | 0.02758 |
|                                     | PR1       | TRINITY_DN21485_c0_g1 | kh_1d_vs_kh_3d | 18.05718  | 4.17450  | 0.00035 |
|                                     |           | TRINITY_DN6126_c0_g2  | kh_1d_vs_kh_3d | 46.59934  | 5.54224  | 0.00000 |
|                                     | CHIB      | TRINITY_DN5952_c0_g1  | kh_1d_vs_kh_3d | 2.33988   | 1.22643  | 0.00898 |
|                                     |           | TRINITY_DN20491_c1_g1 | kh_1d_vs_kh_3d | 4.35911   | 2.12403  | 0.03017 |
|                                     |           | TRINITY_DN20491_c0_g1 | kh_1d_vs_kh_3d | 4.07870   | 2.02811  | 0.01869 |
|                                     | NDPK2     | TRINITY_DN10975_c0_g1 | kh_1d_vs_kh_3d | 0.43377   | -1.20499 | 0.02007 |
|                                     | PYL       | TRINITY_DN15307_c0_g1 | kh_1d_vs_kh_3d | 0.17776   | -2.49200 | 0.00147 |
|                                     |           | TRINITY_DN3450_c1_g1  | kh_1d_vs_kh_3d | 0.17031   | -2.55377 | 0.00011 |
|                                     |           | TRINITY_DN3450_c0_g2  | kh_1d_vs_kh_3d | 0.29782   | -1.74749 | 0.00000 |
|                                     |           | TRINITY_DN4825_c1_g1  | kh_1d_vs_kh_3d | 0.23541   | -2.08677 | 0.00481 |
|                                     |           | TRINITY_DN4825_c0_g3  | kh_1d_vs_kh_3d | 0.09542   | -3.38961 | 0.00003 |
|                                     |           | TRINITY_DN4825_c0_g1  | kh_1d_vs_kh_3d | 0.10069   | -3.31200 | 0.00012 |
|                                     | PLR       | TRINITY_DN57829_c0_g1 | kh_3d_vs_kh7d  | 0.20872   | -2.26031 | 0.00290 |
|                                     |           | TRINITY_DN20595_c0_g1 | kh_3d_vs_kh7d  | 0.03937   | -4.66671 | 0.00017 |
|                                     |           | TRINITY_DN18685_c0_g1 | kh_3d_vs_kh7d  | 0.25122   | -1.99293 | 0.01533 |

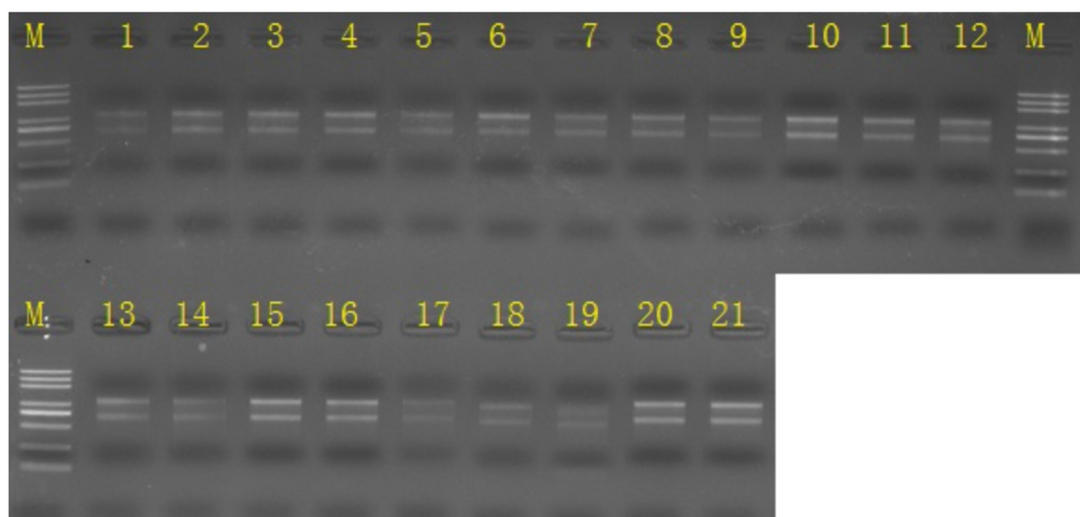

Figure. S1 The electropherograms presenting the RNA bands in agarose gels for twenty-one samples.

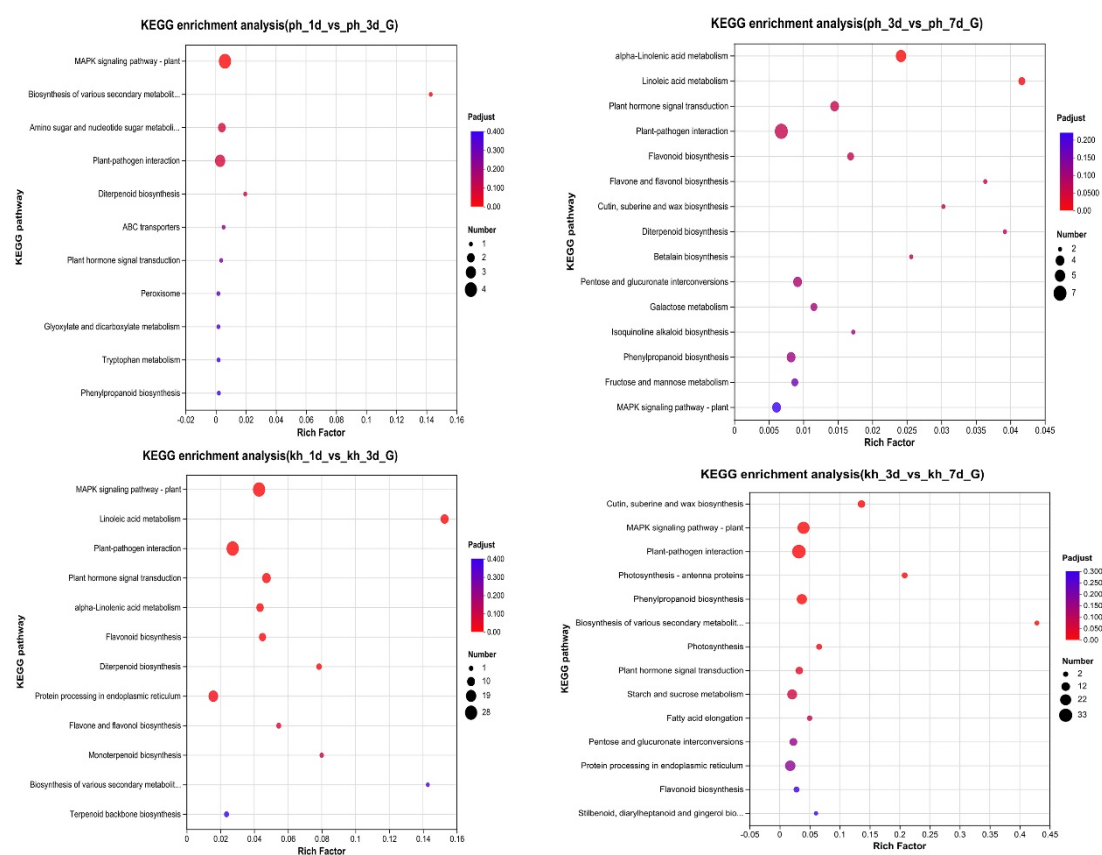

Figure. S2 the KEGG analysis of DEGs in susceptible and PWN-resistant *P. thunbergii*
